# Supplementary material for: A novel cationic iridium(iii) complex with a thiorhodamine-based auxiliary ligand: application for luminescent and colorimetric detection of Hg2+in an aqueous solution
Source: Royal Society of Chemistry journal article supplement (doi:10.1039/c7nj00734e), 2017-01-01
Supplement: c7nj00734e1.pdf [file c7nj00734e1.pdf]

## Electronic Supplementary Information

Submitted to *New Journal of Chemistry*

**Title:** A novel cationic iridium(III) complex with a thiorhodamine-based auxiliary ligand:

Application for luminescent and colorimetric detection of  $\text{Hg}^{2+}$  in aqueous solution

**Authors:** Zeyu Chen, Guoyun Meng, Huaijun Tang,\* Yanchun Ye, Riyong Sun, Mingxian Chen and Kai-Min Wang\*

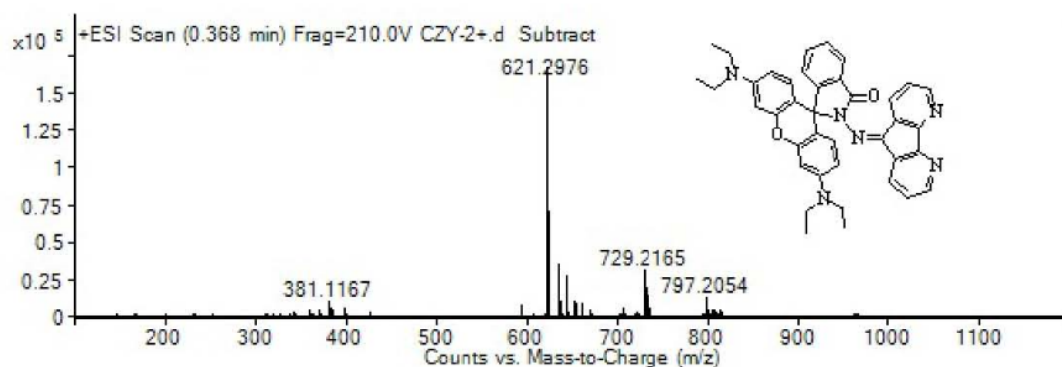

Fig. S1 Mass spectrum of RB-DAF

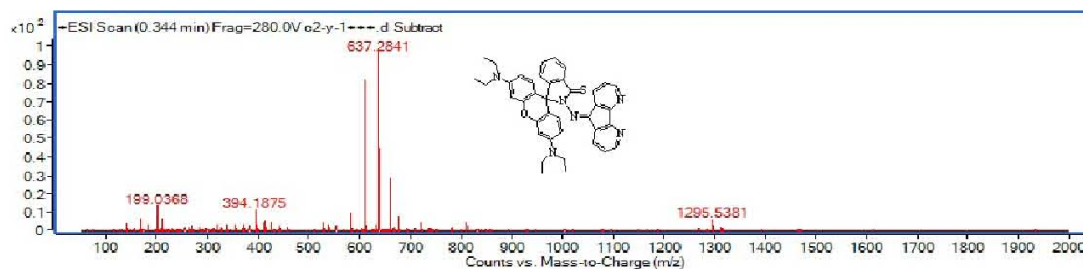

Fig. S2 Mass spectrum of SRB-DAF

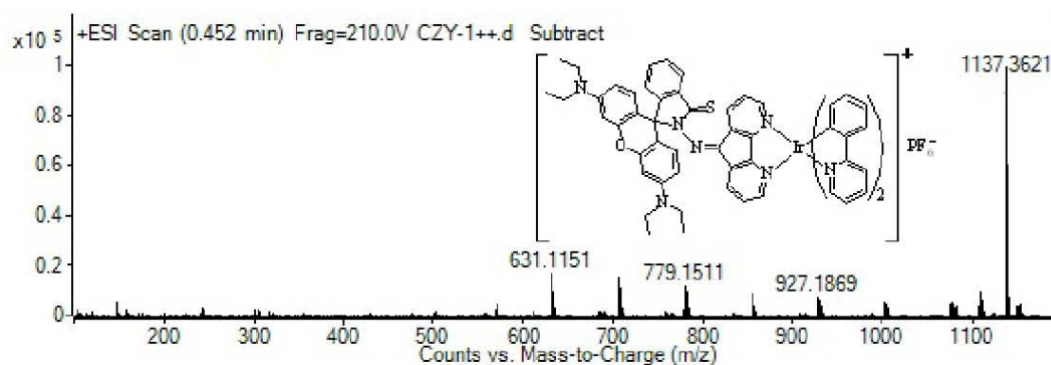

Fig. S3 Mass spectrum of [(SRB-DAF)Ir(ppy)<sub>2</sub>]<sup>+</sup>PF<sub>6</sub><sup>-</sup>

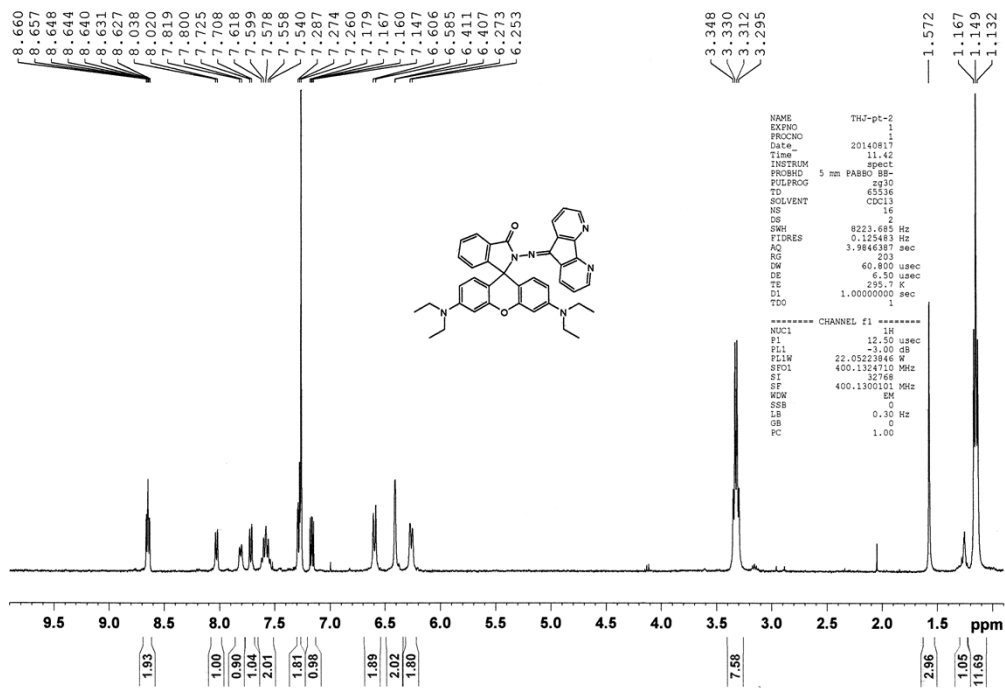

Fig. S4  $^1\text{H}$  NMR spectrum of RB-DAF

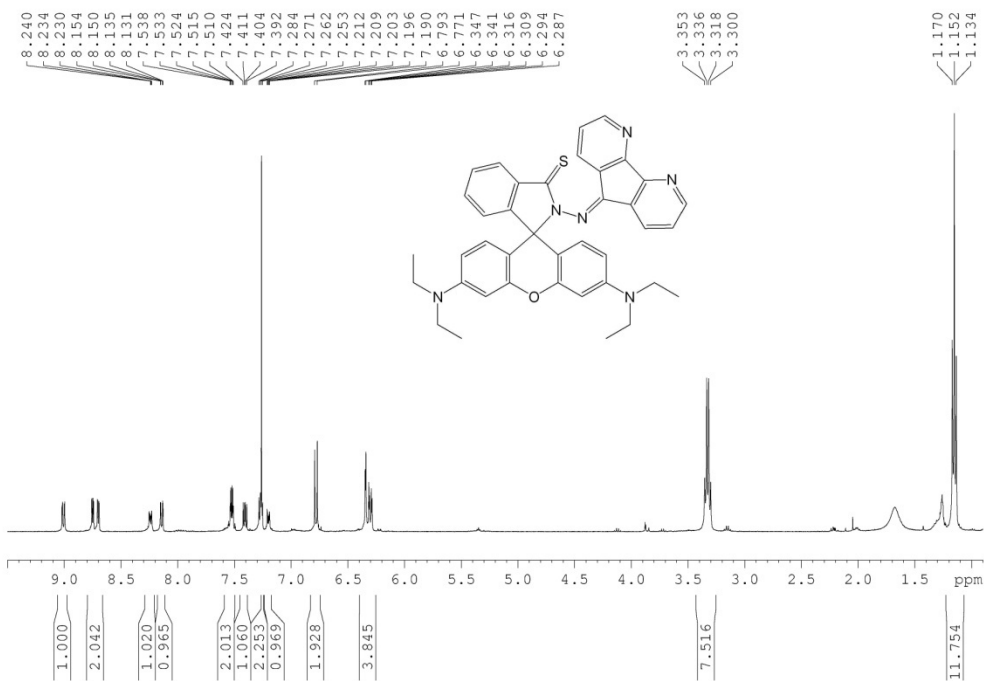

Fig. S5  $^1\text{H}$  NMR spectrum of SRB-DAF

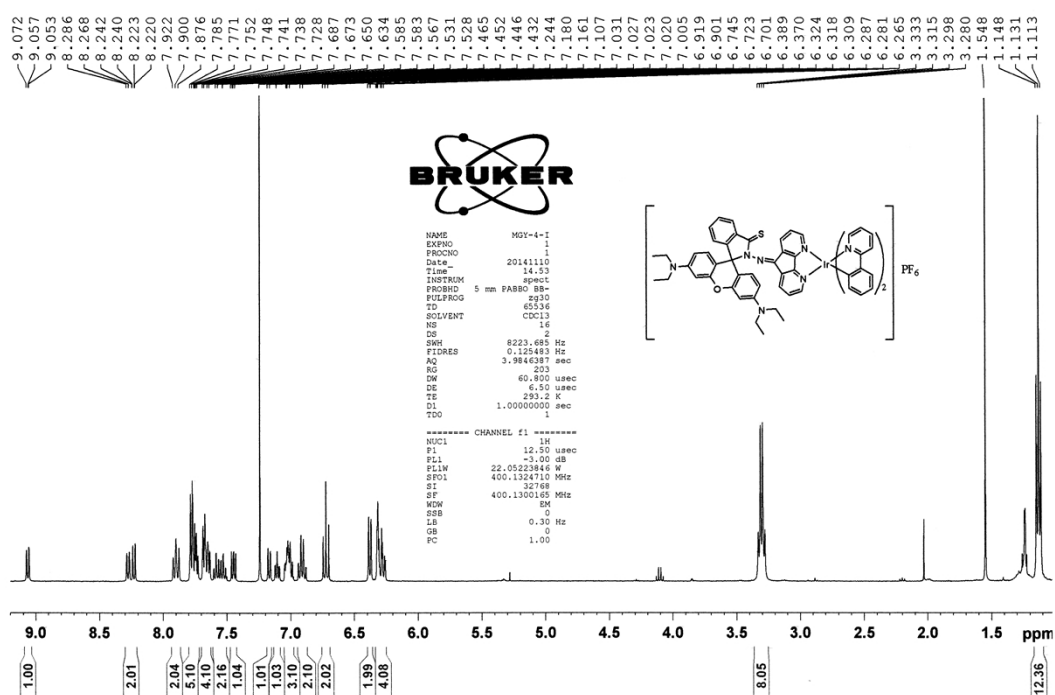

Fig. S6  $^1\text{H}$  NMR spectrum of  $[(\text{SRB-DAF})\text{Ir}(\text{ppy})_2]\text{PF}_6$

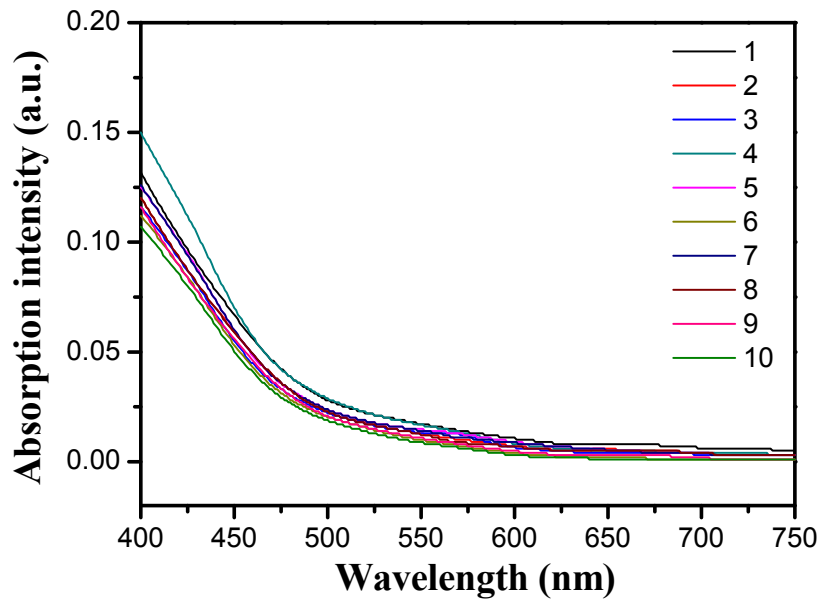

Fig. S7 The absorption spectra of 10 times blank measurements

Table S1 Absorption intensity at 567 nm, deviations, deviation squares and standard deviation of 10 times blank absorption measurements

| Sequence numbers | Absorption intensity at 567 nm | Deviations | Deviation squares    | Standard deviation |
|------------------|--------------------------------|------------|----------------------|--------------------|
| 1                | 0.015                          | 0.004      | $1.6 \times 10^{-5}$ | 0.00271            |
| 2                | 0.011                          | 0          | 0                    |                    |
| 3                | 0.013                          | 0.002      | $4.0 \times 10^{-6}$ |                    |
| 4                | 0.014                          | 0.003      | $9.0 \times 10^{-6}$ |                    |
| 5                | 0.013                          | 0.002      | $4.0 \times 10^{-6}$ |                    |
| 6                | 0.008                          | -0.003     | $9.0 \times 10^{-6}$ |                    |
| 7                | 0.011                          | 0          | 0                    |                    |
| 8                | 0.009                          | -0.002     | $4.0 \times 10^{-6}$ |                    |
| 9                | 0.009                          | -0.002     | $4.0 \times 10^{-6}$ |                    |
| 10               | 0.007                          | -0.004     | $1.6 \times 10^{-5}$ |                    |

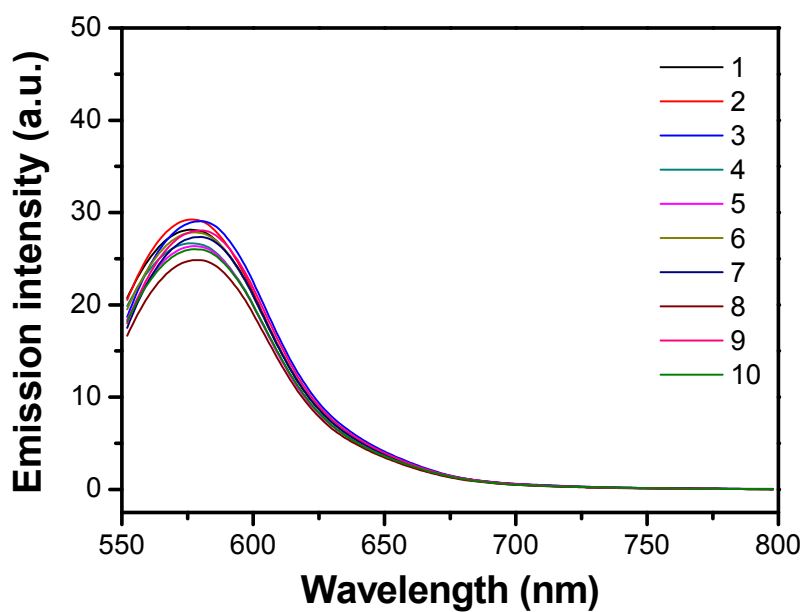

Fig. S8 The emission spectra of 10 times blank measurements

Table S2 Emission intensity at 587 nm, deviations, deviation squares and standard deviation of  
10 times blank emission measurements

| <b>Sequence numbers</b> | <b>Emission intensity at 587 nm</b> | <b>Deviations</b> | <b>Deviation squares</b> | <b>Standard deviation</b> |
|-------------------------|-------------------------------------|-------------------|--------------------------|---------------------------|
| 1                       | 26.6409                             | 0.4044            | 0.16354                  | 1.3143                    |
| 2                       | 27.57328                            | 1.33678           | 1.78698                  |                           |
| 3                       | 28.20423                            | 1.96773           | 3.87195                  |                           |
| 4                       | 25.34816                            | -0.88834          | 0.78915                  |                           |
| 5                       | 25.24046                            | -0.99604          | 0.9921                   |                           |
| 6                       | 26.64498                            | 0.40848           | 0.16685                  |                           |
| 7                       | 26.48222                            | 0.24572           | 0.06038                  |                           |
| 8                       | 23.95531                            | -2.28119          | 5.20384                  |                           |
| 9                       | 27.25406                            | 1.01756           | 1.03542                  |                           |
| 10                      | 25.02142                            | -1.21508          | 1.47642                  |                           |
